1  
2  
3  
4  
5  
6  
7  
8  
9  
10  
11  
12  
13  
14  
15  
16  
17  
18  
19  
20  
21  
22  
23  
24  
25  
26  
27  
28  
29  
30  
31  
32  
33  
34  
35  
36  
37

***Embryonic expression patterns of panarthropod Teneurin-m/odd Oz genes suggest a possible function in segmentation***

*Ralf Janssen*

Uppsala University, Department of Earth Sciences, Palaeobiology, Villavägen 16, Uppsala, Sweden

e-mail: [ralf.janssen@geo.uu.se](mailto:ralf.janssen@geo.uu.se)

Figures: 5  
Tables: ---  
Supplementary data: 6 figures, 2 tables

Keywords: odd Oz, odz, pair-rule, segmentation, teneurin, tenascin, Arthropoda, Onychophora, Panarthropoda

38 **Abstract**

39 **Background** A hallmark of arthropods is their segmented body, and the so-called *Drosophila*  
40 segmentation gene cascade that controls this process serves as one of the best-studied gene  
41 regulatory networks. An important group of segmentation genes is represented by the pair-rule  
42 genes (PRGs). One of these genes was thought to be the type-II transmembrane protein  
43 encoding gene *Tenascin-m* (*Ten-m* (aka *odd Oz*)). *Ten-m*, however, does not have a pair-rule  
44 function in *Drosophila*, despite its characteristic PRG-like expression pattern. A recent study  
45 in the beetle *Tribolium castaneum* showed that its *Ten-m* gene is not expressed like a  
46 segmentation gene, and hence is very unlikely to have a function in segmentation.

47 **Results** In this study, I present data from a range of arthropods covering the arthropod tree of  
48 life, and an onychophoran, representing a closely related group of segmented animals. At least  
49 one ortholog of *Ten-m/odz* in each of these species is expressed in the form of transverse  
50 segmental stripes in the ectoderm of forming and newly formed segments – a characteristic of  
51 genes involved in segmentation.

52 **Conclusions** The new expression data support the idea that *Ten-m* orthologs after all may be  
53 involved in panarthropod segmentation.

54

55

56

57

58

59

60

61

62

## 63 **Introduction**

64 Teneurins represent a highly-conserved family of type-II transmembrane-protein encoding  
65 genes that possess a complex and invariant complement of functional domains (e.g. Tucker,  
66 2018; DePew et al., 2019; Schöneberg and Prömel, 2019). Teneurins are present in at least all  
67 of Bilateria (Tucker and Chiquet-Ehrismann, 2006), and although orthologs appear to be absent  
68 in sponges, ctenophores and cnidarians, a possible ortholog of bilaterian teneurins has been  
69 identified in a choanoflagellate (Tucker et al., 2012). The first teneurin genes were discovered  
70 in the vinegar fly *Drosophila melanogaster*. Due to their structural similarity to the  
71 extracellular matrix *glycoprotein* Tenascin, these were called *Tenascin-a* (*Ten-a*)  
72 (Baumgartner and Chiquet-Ehrismann, 1993) and *Tenascin-m* (*Ten-m*) (Baumgartner et al.,  
73 1994), the only two teneurins in *Drosophila*. Interestingly, *Ten-m* was independently identified  
74 by another research group and named *odd Oz* (*odz*) after its expression in the brain and the  
75 heart (the gifts bestowed by the wizard of Oz) (Levine et al., 1994). In recent years,  
76 phylogenetic analyses revealed the presence of both orthologs, *Ten-a* and *Ten-m*, in all  
77 arthropods, but also showed that in onychophorans, a closely related outgroup to arthropods,  
78 and in another ecdysozoan, the nematode worm *Caenorhabditis elegans*, there is only one  
79 teneurin gene (Minet and Chiquet-Ehrismann, 2000; Wides, 2019) (Figure 1A). This gene is  
80 similar to both arthropod *Ten-a* and *Ten-m* and thus suggests that the latter are the result of a  
81 gene duplication in the stem leading to Arthropoda.

82 Of the two *Drosophila* teneurin genes, *Ten-m* appeared to be the more interesting because it  
83 was thought to represent a pair-rule gene (Baumgarnter et al., 1994; Levine et al., 1994), and  
84 thus a component of the famous *Drosophila* segmentation gene cascade (StJohnston and  
85 Nüsslein-Volhard, 1992). Critical reexamination, however, revealed that *odd paired* (*opa*) and  
86 not *Ten-m* was responsible for the reported pair-rule phenotypes, and that *Ten-m* is involved in  
87 motor neuron growth and guidance, and not segmentation (Zheng et al., 2011). At some point,

88 a pair-rule function was even attributed to *Ten-a*, but somewhat tragically, even this finding  
89 was incorrect (Rakovitsky et al., 2007 (retracted in 2012)). However, since *Ten-m* protein is  
90 expressed in a “typical” pair-rule like pattern in *Drosophila* (Baumgarner and Levine, 1994;  
91 Levine et al., 1994), alternative functions in segmentation were discussed, and a possible  
92 function as an oscillator in segmentation was suggested (Hunding and Baumgartner, 2017).  
93 The very recent work of Jin et al. (2019) investigated the embryonic expression pattern of *Ten-*  
94 *m* in the red flour beetle *Tribolium castaneum*. From their data, Jin and colleagues (2019)  
95 concluded that *Ten-m* cannot be involved in segmentation, since it is not expressed in the  
96 ectoderm and thus in tissue that is undergoing primary segmentation. The combined data from  
97 *Drosophila* and *Tribolium* somewhat intuitively suggest that the pair-rule like expression of  
98 *Ten-m* in the highly-derived dipteran fly *Drosophila* may represent a derived feature.

99 In this paper, however, I present the first comprehensive data on the embryonic expression  
100 patterns of teneurin genes (*Ten-m* and *Ten-a* genes) in Panarthropoda, represented by the red  
101 flour beetle *Tribolium castaneum* (Hexapoda: Coleoptera), the pill millipede *Glomeris*  
102 *marginata* (Myriapoda: Diplopoda), the common house spider *Parasteatoda tepidariorum*  
103 (Chelicerata: Arachnida), and the velvet worm *Euperipatoides kanangrensis* (Onychophora:  
104 Peripatopsidae) (Figure 1B-E). The new data show unique expression profiles of each  
105 investigated teneurin gene, but also reveal that at least one paralog of *Ten-m* in each species  
106 (except for *Tribolium*) is indeed expressed in a pattern that is compatible with a possible  
107 function in segmentation. The lack of such expression of *Ten-m* in *Tribolium* may thus  
108 represent a derived rather than an ancestral feature of *Ten-m* function.

109

## 110 **Results**

111 *Complement and phylogenetic distribution of panarthropod teneurin genes*

112 Reciprocal BLAST searches revealed the presence of two teneurin genes in *Tribolium* and  
113 *Glomeris*, five in the *Parasteatoda* and one in *Euperipatoides* (Figure 1A). The distribution of  
114 teneurin genes reflects the relationship of the panarthropod species used in this study (e.g.  
115 Campbell et al., 2011) (Figure 1 A). The phylogenetic distribution of these genes suggests that  
116 a single teneurin gene was present in the last common ancestor of arthropods and  
117 onychophorans, and that this gene was duplicated in the stem leading to the arthropods. In the  
118 spider, these genes, *Ten-a* and *Ten-m*, underwent additional duplications. One of these  
119 duplications is likely the result of a whole genome duplication that occurred in the last common  
120 ancestor of Arachnoplumonata (Schwager et al., 2017) giving rise to *Ten-a1* and *Ten-a2* as  
121 well as *Ten-m1/2* and *Ten-m3*. An additional duplication event then lead to the presence of  
122 three paralogs of *Ten-m* in the spider (*Ten-m1/2* duplicating into *Ten-m1* and *Ten-m2*) (Figure  
123 1A).

124

#### 125 *Expression of arthropod Teneurin-m (Ten-m) orthologs*

126 *Glomeris Ten-m* is first expressed in the form of transverse segmental stripes in the *regio*  
127 *germinalis* that originates from the early blastoderm (Figure 2A/B) (see Janssen et al., 2004).  
128 *Ten-m* is also weakly expressed in the form of a stripe in the segment addition zone (SAZ)  
129 (Figure 2A-E). The segmental stripes disappear as the segments mature and resolve into dots  
130 of expression in the ventral tissue (likely associated with the developing ventral nervous  
131 system), and solid blocks of expression in the dorsal segmental units (Figure 2C-H) (see  
132 Janssen, 2011). Additional expression is in the ocular region that harbors the developing brain  
133 (Figure 2A-H), the mesoderm of all appendages (Figure 2C-H and Supplementary Figure S1A)  
134 and of the anal valves (Figure 2B-H). In late stages, *Ten-m* is also expressed in the developing  
135 heart (Figure 2H).

136 *Parasteatoda Ten-m1* is only expressed in late developmental stages when it is in the head  
137 lobes, the ventral nervous system, and in the form of a single dot dorsal in the base of the  
138 pedipalps and the legs (Supplementary Figure S2).

139 *Parasteatoda Ten-m2* is expressed in transverse segmental stripes (Figure 3). First, a single  
140 broad stripe appears anterior in the forming germ band; this stripe is likely associated with the  
141 formation of the labrum and the cheliceral segment (Figure 3A). At subsequent developmental  
142 stages, additional stripes form, each associated with a single segment (Figures 3B-H and 4C/D).  
143 Later, it becomes clear that the position of these stripes is located in the forming inter-segmental  
144 grooves (Figures 3E, 4C and Supplementary Figure S3). *Parasteatoda Ten-m2* is also  
145 expressed in the developing brain in the head lobes (Figures 3B-H and 4A/E/H), the ventral  
146 nervous system (Figures 3F/G and 4A-C), and in a complex pattern in the appendages (Figure  
147 4E/F and Supplementary Figure S5B).

148 *Parasteatoda Ten-m3* is expressed in dorsal most tissue corresponding to the head lobes  
149 (Supplementary Figure S4A/B/E), the prosoma (Supplementary Figure S4A/C) and the  
150 opisthosoma (Supplementary Figure S4A-E) with exception of the SAZ (Supplementary  
151 Figure S4A/B/D). Later, expression in the opisthosoma likely relates to the development of the  
152 alary muscles of the heart (Supplementary Figure S4H/I) (cf. Janssen and Damen, 2008). *Ten-*  
153 *m3* is also expressed in the head lobes (Supplementary Figure S4E/G/I), the mesoderm of the  
154 chelicerae and in the form of a distal mesodermal patch in the pedipalps and the legs  
155 (Supplementary Figures S4F/J and S1C).

156

157 *Expression of the single onychophoran teneurin gene, Teneurin-a/m (Ten-a/m)*

158 *Euperipatoides Ten-a/m* is expressed in the frontal appendages (Figure 5), weakly in the mouth  
159 and anus (Figure 5A-C), and in the mesoderm of newly formed posterior segments (Figure 5A-

160 D). At later developmental stages, expression appears in the posterior part of the eyes (Figure  
161 5D-F) and the mesoderm of all appendages and the anal valves.

162

163 *Expression of arthropod Teneurin-a (Ten-a) orthologs*

164 *Tribolium Ten-a* is strongly expressed in the developing brain in the ocular region  
165 (Supplementary Figure S5A-D), the ventral nervous system (Supplementary Figure S5B-D),  
166 and in a subset of cells that likely correspond to the peripheral nervous system (Supplementary  
167 Figure S5D). At later stages, it is also expressed in distal region of the developing hindgut  
168 (Supplementary Figure S5D).

169 Like for *Tribolium*, *Glomeris Ten-a* is expressed in the brain and the ventral nervous system,  
170 albeit much later and weaker than in *Tribolium* (Supplementary Figure S5E-G). Additional  
171 expression is in the form of a small dot at the dorsal base of the antennae and in the anal valves  
172 (Supplementary Figure 5E-G).

173 *Parasteatoda Ten-a1* is expressed in the brain in late developmental stages, the ventral nervous  
174 system and the mesoderm of the appendages (except for the labrum) (Supplementary Figures  
175 S6A-F and S1D).

176 *Parasteatoda Ten-a2* is first expressed in the ventral nervous system associated with the  
177 prosomal segments (Supplementary Figure S6G-L). In the pedipalps and the legs, but not the  
178 other appendages, *Ten-a2* is expressed in the form of a sub-terminal domain (Supplementary  
179 Figures S6G/K/L and S1E). At later developmental stages, *Ten-a2* is also expressed in the brain  
180 and in the developing book lungs and tracheal lungs in the second and third opisthosomal  
181 segment (Supplementary Figure S6L).

182

## 183 **Discussion**

184 *A possible function of Ten-m/odz in arthropod segmentation*

185 The *Drosophila* segmentation gene cascade (SGC) arguably is the most famous and one of the  
186 best-investigated gene regulatory network. This hierarchic gene interaction is in control of  
187 anterior-posterior body patterning of the fly, and thus the process of segment formation (e.g.  
188 Nüsslein-Volhard and Wieschaus, 1980; Ingham, 1988; Cohen and Jürgens, 1991). *Drosophila*  
189 development represents a derived form of segmentation in which most of its body is  
190 patterned/segmented (almost) simultaneously from a uniform blastoderm (e.g. Pankratz and  
191 Jäckle, 1993). Many of the genes involved in this process, however, likely play similar  
192 function(s) in other arthropods and their closest relatives, the tardigrades and the  
193 onychophorans, all of which add segments sequentially from a posterior segment-addition zone  
194 (reviewed in e.g. Peel et al., 2005; Damen, 2007; Smith and Goldstein, 2017; Janssen, 2017;  
195 Dunlop and Lamsdell, 2017). One important level of the SGC is represented by the pair-rule  
196 genes (PRGs). PRGs are transcription factor-encoding genes that are typically expressed in the  
197 form of a unique pattern of seven transverse stripes in the late blastoderm of the fly (e.g.  
198 Harding et al., 1986; Carroll and Scott, 1986; Gergen and Butler, 1988; Carroll et al., 1988).  
199 In arthropods with sequential addition and patterning of segments, the orthologs of these genes  
200 are expressed in the form of transverse stripes or dynamic domains in the ectoderm of the  
201 posterior segment addition zone (SAZ) or newly formed segments, or are expressed as  
202 transverse stripes in the anterior segments that derive from the blastoderm (e.g. Damen et al.,  
203 2005; Choe et al., 2006, 2017; Choe and Brown, 2007; Janssen et al., 2011, 2012; Eriksson et  
204 al., 2013; Auman and Chipman, 2018).

205 In a recent study, Jin and colleagues (2019) demonstrated that in the beetle *Tribolium*, *Ten-m*  
206 is not expressed like a segmentation gene, and thus is not involved in segmentation.

207 In *Glomeris* and *Parasteatoda*, however, at least one ortholog of *Ten-m* is expressed in the  
208 form of transverse segmental stripes in newly forming segments, both in anterior segments that  
209 originate from the early blastoderm (or the germ disc in the spider), and in segments that are



210 added from the posterior SAZ (Figures 2-4 and S3). This suggests a possible function in  
211 segment formation, or maintenance of segmental boundaries. The expression of *Glomeris Ten-*  
212 *m* and *Parasteatoda Ten-m2* is very similar to that of other segmentation genes including the  
213 pair-rule gene orthologs in these species (Damen et al., 2005; Janssen et al., 2008, 2011, 2012;  
214 Janssen, 2012; Schönauer et al., 2016; Hemmi et al., 2018). In *Glomeris*, the primary PRGs  
215 *runt (run)* and *even-skipped (eve)* both are expressed in the form of one (or more) circles around  
216 the posterior pole (anus) of the developing embryo, representing a unique feature of PRG  
217 expression (Janssen et al., 2011); and this detail of PRG expression is also present for *Ten-m*  
218 (Figure 2G).

219 The phylogenetic distribution of segmentation-gene like expression of Teneurin-m genes in  
220 Arthropoda thus suggests that the lack of such expression in *Tribolium* is a derived character.  
221 The single teneurin gene of the onychophoran *Euperipatoides* is also expressed in transverse  
222 segmental stripes in newly formed segments (Figure 5). In onychophorans, however, the PRG-  
223 system appears to be little conserved (Janssen and Budd, 2013), and the segmentation-gene  
224 like expression of *Ek-Ten-a/m* is not as obvious as in arthropods. Notably, however, the  
225 expression of *Ten-a/m* is very similar to that of the only PRG ortholog that is possibly involved  
226 in onychophoran segmentation (or at least posterior elongation), *even-skipped (eve)* (Janssen  
227 and Budd, 2013). Thus, the expression of *Ten-a/m* could indicate that a possible segmentation-  
228 gene (or related) function may date back to the last common ancestor of Panarthropoda, and  
229 that such function was already established before the duplication of an ancestral panarthropod  
230 teneurin gene (*Ten-a/m*) into *Ten-m* and *Ten-a*. It was therefore necessary to investigate  
231 whether such function/expression could have been retained in the *Ten-a* orthologs of  
232 arthropods including the beetle *Tribolium* that does not express *Ten-m* in a segmentation-gene  
233 like pattern (Jin et al., 2019). Gene expression analysis of *Ten-a* orthologs in all investigated  
234 arthropods, including *Tribolium*, however, revealed that neither of them is expressed like a

235 potential segmentation gene, revealing that the segmentation-gene like expression of arthropod  
236 teneurin genes is a feature of *Ten-m*, and that the lack of such expression in *Tribolium* indeed  
237 likely represents a derived character.

238 Further investigation including functional studies may reveal if arthropod *Ten-m* genes indeed  
239 are involved in segmentation, and what their function(s) in this process may be.

240

## 241 **Experimental Procedures**

### 242 *Research organisms and embryos*

243 Research animals and their embryos were handled as described in Grossmann and Prpic (2012)  
244 (*Tribolium castaneum*), Janssen et al. (2004) (*Glomeris marginata*), Prpic et al. (2008)  
245 (*Parasteatoda tepidariorum*), and Hogvall et al. (2014) (*Euperipatoides kanangrensis*).  
246 Developmental staging follows Strobl and Stelzer (2014) (*Tribolium*), Janssen et al. (2004)  
247 (*Glomeris*), Mittmann and Wolff (2012) (*Parasteatoda*), and Janssen and Budd (2013)  
248 (*Euperipatoides*).

249

### 250 *RNA extraction, gene cloning, whole mount in-situ hybridization, and nuclear counter staining*

251 Total RNA was extracted with TRIZOL (Invitrogen) from a mix of embryos representing all  
252 stages from the blastoderm stage to hatching. Total RNA was then reverse transcribed into  
253 cDNA using the SuperScript IV Reverse Transcriptase (Invitrogen). Gene fragments were  
254 amplified by RT-PCR with gene-specific primers based on sequenced genomes (*Tribolium* and  
255 *Parasteatoda*) and sequenced embryonic transcriptomes (*Glomeris* (SRA accession:  
256 PRJNA525752) and *Euperipatoides* (SRA accession: PRJNA525753)). In all cases, a nested  
257 PCR was performed, using an initial PCR as template. Primer sequences are listed in  
258 Supplementary Table 1. Gene fragments were cloned into the PCR II vector (Invitrogen) and  
259 sequenced on an ABI3730XL automatic sequencer (Macrogen, Seoul, South Korea). Unique

260 gene identifiers are listed in Supplementary Table 2. *In-situ* hybridization was performed as  
261 described in Janssen et al. (2018) using BM Purple (Roche) as staining substrate. For confocal  
262 microscopy, embryos were stained with SIGMAFAST Fast Red TR/NaphtolAS-MX  
263 (SIGMA). Morphology of the embryos was visualized with the nuclear dye SYBR Green in  
264 phosphate buffered saline with 0.1% Tween-20 (PBST-0.1%).

265

### 266 *Phylogenetic analysis*

267 Reciprocal BLAST searches applying tblastn, blastp and blasty were run with the *Drosophila*  
268 *melanogaster* sequences of Tenascin-m (aka Odd Oz (Odz)) and Tenascin-a to identify teneurin  
269 genes. Amino acid sequences were aligned using T-Coffee with default parameters in  
270 MacVector v12.6.0 (MacVector, Inc., Cary, NC), or Aliview 1.18.1 for Linux (Larsson, 2014).  
271 The phylogenetic analysis was performed with MrBayes (Huelsenbeck and Ronquist, 2001)  
272 with a fixed WAG amino acid substitution model with gamma-distributed rate variation across  
273 sites (with four rate categories), unconstrained exponential prior probability distribution on  
274 branch lengths, and exponential prior for the gamma shape parameters for among-site rate  
275 variation. The phylogenetic tree was calculated applying 300000 cycles for the Metropolis-  
276 Coupled Markov Chain Monte Carlo (MCMCMC) analysis (four chains; chain-heating  
277 temperature of 0.2). Markov chains were sampled every 200 cycles. 25% of samples were  
278 applied as burn-in. Clade support was determined with posterior probabilities in MrBayes.  
279 Unique sequence identifiers for all sequences used in the phylogenetic analysis are listed in  
280 Supplementary Table 2.

281

### 282 *Data documentation*

283 A Leica DC490 digital camera equipped with a UV light source mounted onto a MZ-FLIII  
284 Leica dissection microscope was used for documentation of stained embryos. Confocal

285 microscopy was performed using an inverted Leica TCS SP5 confocal microscope. For the  
286 detection of Fast Red and DAPI signal. Emission wavelengths for Fast Red and DAPI were  
287 561nm and 404nm, respectively. Collected wavelengths for Fast Red were between 600nm and  
288 642nm, and for DAPI were between 430nm and 550nm. Whenever appropriate, contrast and  
289 brightness were adjusted with the image-processing software Adobe Photoshop CC2018 for  
290 Apple Macintosh (Adobe Systems Inc.).

291

## 292 **Acknowledgments**

293 I would like to acknowledge the support of the New South Wales Government Department of  
294 Environment and Climate Change by provision of a permit SL100159 to collect onychophorans  
295 at Kanangra-Boyd National Park, and Glenn Brock, David Mathieson, Robyn Stutchbury and  
296 Noel Tait for their help during onychophoran collection. Embryos of *Parasteatoda* and  
297 *Tribolium* were kindly provided by Matthias Pechmann, Anna Schönauer, Alistair McGregor  
298 and Gregor Bucher. The picture of an adult *Tribolium castaneum* shown in Figure 1 is a gift  
299 from Gregor Bucher.

300

## 301 **References**

302 Auman T, Chipman AD. Growth zone segmentation in the milkweed bug *Oncopeltus fasciatus*  
303 sheds light on the evolution of insect segmentation. *BMC Evol Biol.* 2018;18:178.  
304 Baumgartner S, Chiquet-Ehrismann R. *Tena*, a *Drosophila* gene related to tenascin, shows  
305 selective transcript localization. *Mech Dev.* 1993;40:165–176.  
306 Baumgartner S, Martin D, Hagios C, Chiquet-Ehrismann R. *Tenm*, a *Drosophila* gene related  
307 to tenascin, is a new pair-rule gene. *EMBO J.* 1994;13:3728–3740.  
308 Campbell LI, Rota-Stabelli O, Edgecombe GD, Marchioro T, Longhorn SJ, Telford MJ,  
309 Philippe H, Rebecchi L, Peterson KJ, Pisani D. MicroRNAs and phylogenomics resolve the

- 310 relationships of Tardigrada and suggest that velvet worms are the sister group of  
311 Arthropoda. *Proc Natl Acad Sci U S A*. 2001;108:15920–15924.
- 312 Carroll SB, Scott MP. Zygotically active genes that affect the spatial expression of the *fushi*  
313 *tarazu* segmentation gene during early *Drosophila* embryogenesis. *Cell*. 1986;45:113–126.
- 314 Carroll SB, Laughon A, Thalley BS. Expression, function, and regulation of the hairy  
315 segmentation protein in the *Drosophila* embryo. *Genes Dev*. 1988;2:883–890.
- 316 Choe CP, Miller SC, Brown SJ. A pair-rule gene circuit defines segments sequentially in the  
317 short-germ insect *Tribolium castaneum*. *Proc Natl Acad Sci U S A*. 2006;103:6560–6564.
- 318 Choe CP, Brown SJ. Evolutionary flexibility of pair-rule patterning revealed by functional  
319 analysis of secondary pair-rule genes, paired and sloppy-paired in the short-germ insect,  
320 *Tribolium castaneum*. *Dev Biol*. 2007;302:281–294.
- 321 Choe CP, Stellabotte F, Brown SJ. Regulation and function of odd-paired in *Tribolium*  
322 segmentation. *Dev Genes Evol*. 2017;227:309–317.
- 323 Cohen S, Jürgens G. *Drosophila* headlines. *Trends Genet*. 1991;8:267–272.
- 324 Damen WG, Janssen R, Prpic NM. Pair rule gene orthologs in spider segmentation. *Evol Dev*.  
325 2005;7:618–628.
- 326 Damen WG. Evolutionary conservation and divergence of the segmentation process in  
327 arthropods. *Dev Dyn*. 2007;236:1379–1391.
- 328 DePew AT, Aimino MA, Mosca TJ. Tenets of teneurin: conserved mechanisms regulate  
329 diverse developmental processes in the *Drosophila* nervous system. *Front Neurosci*.  
330 2019;13:27.
- 331 Dunlop JA, Lamsdell JC. Segmentation and tagmosis in Chelicerata. *Arthropod Struct Dev*.  
332 2017;46:395–418.
- 333 Eriksson BJ, Ungerer P, Stollewerk A. The function of Notch signalling in segment formation  
334 in the crustacean *Daphnia magna* (Branchiopoda). *Dev Biol*. 2013;383:321–330.

- 335 Fascetti N, Baumgartner S. Expression of *Drosophila* Ten-a, a dimeric receptor during  
336 embryonic development. *Mech Dev.* 2002;114:197–200.
- 337 Gergen JP, Butler BA. Isolation of the *Drosophila* segmentation gene runt and analysis of its  
338 expression during embryogenesis. *Genes Dev.* 1988;2:1179–1193.
- 339 Grossmann D, Prpic NM. Egfr signaling regulates distal as well as medial fate in the embryonic  
340 leg of *Tribolium castaneum*. *Dev Biol.* 2012;370:264–272.
- 341 Harding K, Rushlow C, Doyle HJ, Hoey T, Levine M. Cross-regulatory interactions among  
342 pair-rule genes in *Drosophila*. *Science.* 1986;233:953–959.
- 343 Hemmi N, Akiyama-Oda Y, Fujimoto K, Oda H. A quantitative study of the diversity of stripe-  
344 forming processes in an arthropod cell-based field undergoing axis formation and growth.  
345 *Dev Biol.* 2018;437:84-104.
- 346 Hogvall M, Schönauer A, Budd GE, McGregor AP, Posnien N, Janssen R. Analysis of the Wnt  
347 gene repertoire in an onychophoran provides new insights into the evolution of  
348 segmentation. *Evodevo.* 2014;5:14.
- 349 Huelsenbeck JP, Ronquist F. MRBAYES: bayesian inference of phylogenetic trees.  
350 *Bioinformatics.* 2001;17:754–755.
- 351 Hunding A, Baumgartner S. Ancient role of ten-m/odz in segmentation and the transition from  
352 sequential to syncytial segmentation. *Hereditas.* 2017;154:8.
- 353 Ingham PW. The molecular genetics of embryonic pattern formation in *Drosophila*. *Nature.*  
354 1988;335:25–34.
- 355 Janssen R, Prpic NM, Damen WG. Gene expression suggests decoupled dorsal and ventral  
356 segmentation in the millipede *Glomeris marginata* (Myriapoda: Diplopoda). *Dev Biol.*  
357 2004;268:89–104.

- 358 Janssen R, Damen WG. Diverged and conserved aspects of heart formation in a spider. *Evol*  
359 *Dev.* 2008;10:155-165.
- 360 Janssen R, Budd GE, Damen WG, Prpic NM. (2008). Evidence for Wg-independent tergite  
361 boundary formation in the millipede *Glomeris marginata*. *Dev Genes Evol* 218:361-370.
- 362 Janssen R. Diplosegmentation in the pill millipede *Glomeris marginata* is the result of dorsal  
363 fusion. *Evol Dev.* 2011;13:477-487.
- 364 Janssen R, Budd GE, Prpic NM, Damen WG. Expression of myriapod pair rule gene orthologs.  
365 *Evodevo.* 2011;2:5.
- 366 Janssen R. Segment polarity gene expression in a myriapod reveals conserved and diverged  
367 aspects of early head patterning in arthropods. *Dev Genes Evol.* 2012;222:299-309.
- 368 Janssen R, Damen WG, Budd GE. Expression of pair rule gene orthologs in the blastoderm of  
369 a myriapod: evidence for pair rule-like mechanisms? *BMC Dev Biol.* 2012;12:15.
- 370 Janssen R, Budd GE. Deciphering the onychophoran 'segmentation gene cascade': Gene  
371 expression reveals limited involvement of pair rule gene orthologs in segmentation, but a  
372 highly conserved segment polarity gene network. *Dev Biol.* 2013;382:224–234.
- 373 Janssen R. A molecular view of onychophoran segmentation. *Arthropod Struct Dev.*  
374 2017;46:341–353.
- 375 Janssen R, Andersson E, Betner E, Bijl S, Fowler W, Höök L, Lehr J, Mannelqvist A, Panara  
376 V, Smith K, Tieman S. Embryonic expression patterns and phylogenetic analysis of  
377 panarthropod Sox genes: insight into nervous system development, segmentation and  
378 gonadogenesis. *BMC Evol Biol.* 2018;18:88.
- 379 Jin S, O J, Stellabotte F, Brown SJ, Choe CP. Expression of *teneurin-m/odd Oz* during  
380 segmentation in the beetle *Tribolium castaneum*. *Gene Expr Patterns.* 2019;31:26–31.
- 381 Levine A, Bashan-Ahrend A, Budai-Hadrian O, Gartenberg D, Menasherow S, Wides R. *Odd*  
382 *Oz*: a novel *Drosophila* pair rule gene. *Cell.* 1994;77:587–598.

- 383 Levine A, Weiss C, Wides R. Expression of the pair-rule gene odd Oz (*odz*) in imaginal tissues.  
384 *Dev Dyn.* 1997;209:1–14.
- 385 Minet AD, Chiquet-Ehrismann R. Phylogenetic analysis of teneurin genes and comparison to  
386 the rearrangement hot spot elements of *E. coli*. *Gene.* 2000;257:87-97.
- 387 Mittmann B, Wolff C. Embryonic development and staging of the cobweb spider *Parasteatoda*  
388 *tepidariorum* C. L. Koch, 1841 (syn.: *Achaearana tepidariorum*; Araneomorphae;  
389 Theridiidae). *Dev Genes Evol.* 2012;222:189–216.
- 390 Nüsslein-Volhard C, Wieschaus E. Mutations affecting segment number and polarity in  
391 *Drosophila*. *Nature.* 1980;287:795–801.
- 392 Pankratz, MJ, Jäckle H. Blastoderm segmentation. In Bate, M. and Martinez Arias, A. (eds),  
393 The development of *Drosophila melanogaster*. Cold Spring Harbor Laboratory Press, Cold  
394 Spring Harbor, NY, 1993; pp. 467–516.
- 395 Peel AD, Chipman AD, Akam M. Arthropod segmentation: beyond the *Drosophila* paradigm.  
396 *Nat Rev Genet.* 2005;6:905–916.
- 397 Prpic NM, Schoppmeier M, Damen WG. Collection and fixation of spider embryos. *CSH*  
398 *Protoc.* 2008;<https://doi.org/10.1101/pdb.prot5067>.
- 399 Rakovitsky N, Buganim Y, Swissa T, Kinel-Tahan Y, Brenner S, Cohen MA, Levine A, Wides  
400 R. *Drosophila Ten-a* is a maternal pair-rule and patterning gene. *Mech Dev.* 2007;124:911–  
401 924.
- 402 Rubin BP, Tucker RP, Martin D, Chiquet-Ehrismann R. Teneurins: a novel family of neuronal  
403 cell surface proteins in vertebrates, homologous to the *Drosophila* pair-rule gene product  
404 Ten-m. *Dev Biol.* 1999;216:195–209.
- 405 Schönauer A, Paese CL, Hilbrant M, Leite DJ, Schwager EE, Feitosa NM, Eibner C, Damen  
406 WG, McGregor AP. The Wnt and Delta-Notch signalling pathways interact to direct pair-



- 407 rule gene expression via caudal during segment addition in the spider *Parasteatoda*  
408 *tepidariorum*. *Development*. 2016;143:2455-2463.
- 409 Schöneberg T, Prömel S. Latrophilins and Teneurins in Invertebrates: No Love for Each Other?  
410 *Front Neurosci*. 2019;13:154.
- 411 Schwager EE, Sharma PP, Clarke T, Leite DJ, Wierschin T, Pechmann M, Akiyama-Oda Y,  
412 Esposito L, Bechsgaard J, Bilde T, Buffry AD, Chao H, Dinh H, Doddapaneni H, Dugan S,  
413 Eibner C, Extavour CG, Funch P, Garb J, Gonzalez LB, Gonzalez VL, Griffiths-Jones S,  
414 Han Y, Hayashi C, Hilbrant M, Hughes DST, Janssen R, Lee SL, Maeso I, Murali SC,  
415 Muzny DM, Nunes da Fonseca R, Paese CLB, Qu J, Ronshaugen M, Schomburg C,  
416 Schönauer A, Stollewerk A, Torres-Oliva M, Turetzek N, Vanthournout B, Werren JH,  
417 Wolff C, Worley KC, Bucher G, Gibbs RA, Coddington J, Oda H, Stanke M, Ayoub NA,  
418 Prpic NM, Flot JF, Posnien N, Richards S, McGregor AP. The house spider genome reveals  
419 an ancient whole-genome duplication during arachnid evolution. *BMC Biol*. 2017;15:62.
- 420 Smith FW, Goldstein B. Segmentation in Tardigrada and diversification of segmental patterns  
421 in Panarthropoda. *Arthropod Struct Dev*. 2017;46:328–340.
- 422 St. Johnston D, Nüsslein-Volhard C. The origin of pattern and polarity in the *Drosophila*  
423 embryo. *Cell*. 1992;68:201–219.
- 424 Strobl F, Stelzer EH. Non-invasive long-term fluorescence live imaging of *Tribolium*  
425 *castaneum* embryos. *Development*. 2014;141:2331–2338.
- 426 Tucker RP, Chiquet-Ehrismann R. Teneurins: a conserved family of transmembrane proteins  
427 involved in intercellular signaling during development. *Dev Biol*. 2006;290:237–245.
- 428 Tucker RP, Beckmann J, Leachman NT, Schöler J, Chiquet-Ehrismann R. Phylogenetic  
429 analysis of the teneurins: conserved features and premetazoan ancestry. *Mol Biol Evol*.  
430 2012;29:1019–1029.

- 431 Tucker RP. Teneurins: Domain Architecture, Evolutionary Origins, and Patterns of  
432 Expression. *Front Neurosci.* 2018;12:938.
- 433 Wides R. The Natural History of Teneurins: A Billion Years of Evolution in Three Key Steps.  
434 *Front Neurosci.* 2019;13:109.
- 435 Zheng L, Michelson Y, Freger V, Avraham Z, Venken KJ, Bellen HJ. *Drosophila* Ten-m and  
436 filamin affect motor neuron growth cone guidance. *PLoS One.* 2011;6:e2295
- 437 Zhou XH, Brandau O, Feng K, Oohashi T, Ninomiya Y, Rauch U, Fässler R. The murine Ten-  
438 m/Odz genes show distinct but overlapping expression patterns during development and in  
439 adult brain. *Gene Expr Patterns.* 2003;3:397–405.

440

## 441 **Figure Legends**

442 Figure 1 – Phylogeny and research organisms

443 **A** Phylogenetic analysis of teneurin genes. Species abbreviations: Dm, *Drosophila*  
444 *melanogaster* (Hexapoda: Diptera); Ek, *Euperipatoides kanangrensis* (Onychophora); Gm,  
445 *Glomeris marginata* (Myriapoda: Diplopoda); Pt, *Parasteatoda tepidariorum* (Chelicerata:  
446 Arachnida); Hs, *Homo sapiens* (Vertebrata); Tc, *Tribolium castaneum* (Hexapoda:  
447 Coleoptera); Blue shade: Teneurin-a group. Purple shade: Teneurin-m (Odz) group. Node  
448 support is given as posterior probabilities. **B** *Tribolium castaneum*. **C** *Glomeris marginata*. **D**  
449 Adult female of *Parasteatoda tepidariorum*. **E** Adult female of *Euperipatoides kanangrensis*.

450

451 Figure 2 – Expression of *Glomeris Ten-m*

452 In all panels, except for panel H, anterior is to the left, ventral views. Panel H represents a  
453 lateral view. Developmental stages are indicated. Arrows point to weak expression in the SAZ.  
454 Arrowheads point to transverse stripes of expression. Asterisks in panels A and B mark delayed  
455 expression in some segments that originate from the *regio germinalis*. The asterisk in panel G

456 points to expression surrounding the posterior pole of the embryo. Filled circles mark  
457 expression in the dorsal segmental units. Open circles in panel H mark lateral domains of  
458 expression. Abbreviations: md, mandibular segment; h, heart; oc, ocular region (brain); SAZ,  
459 segment addition zone; T1, first walking-leg bearing segment.

460

461 Figure 3 – Early expression of *Parasteatoda Ten-m2*

462 In all panels, anterior is to the left, ventral views (except for panel B, lateral view).  
463 Developmental stages are indicated. Panels A'-H' represent Cybr-Green counter-stained  
464 embryos as seen in panels A-H. The arrows in panel H points to weak stripe of expression in  
465 the SAZ. Arrowheads mark transverse segmental stripes of expression. Asterisks mark  
466 expression in the anterior head (labral and cheliceral segment). Abbreviations: head lobe; L3,  
467 third leg-bearing segment; SAZ, segment addition zone.

468

469 Figure 4 – Late expression of *Parasteatoda Ten-m2*

470 In all panels, anterior is to the left and ventral view (except panel D, lateral view and panel H,  
471 dorsal view). Arrowheads point to transverse segmental stripes of expression. Arrows point to  
472 expression in the brain. Asterisks in panels G/H mark expression in the alary muscles. Filled  
473 circles mark expression in the ventral nervous system. Panels A'-G' represent Cybr-Green  
474 counter-stained embryos as seen in panels A-G. Abbreviations: br, brain; ch, chelicera; hl, head  
475 lobe, L2, second walking-leg bearing segment; m, mouth; O2/4, second and fourth  
476 opisthosomal segment respectively;

477

478 Figure 5 – Expression of the single *Euperipatoides teneurin* gene, *Ten-a/m*

479 In all panels, anterior is to the left. Panels A and B represent ventral views; panels B-F represent  
480 lateral views. Arrowheads point to transverse stripes of expression in newly formed segments.

481 Abbreviations: a, anus; e, eye; fap, frontal appendage; m, mouth; saz, segment addition zone;  
482 sp, slime papilla.

483

484

485

486

487

488

489

490

491

492

493

494

495

496

497

498

499

500

501

502

503

504

505

506 **Figures**

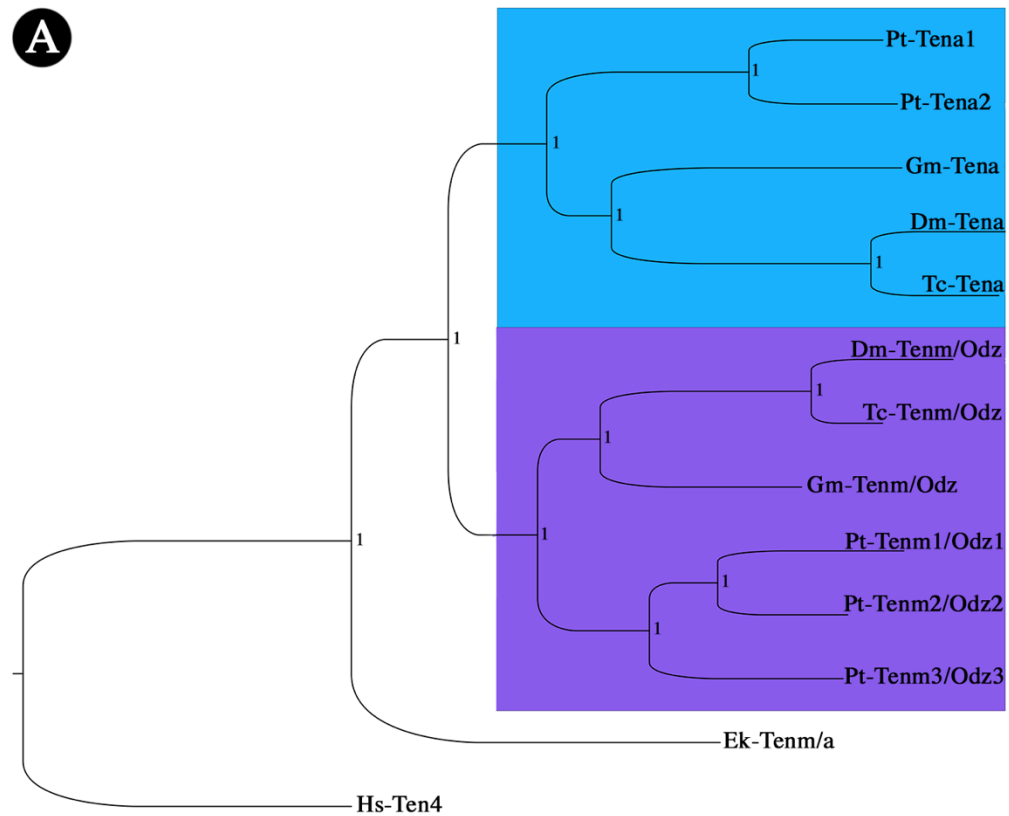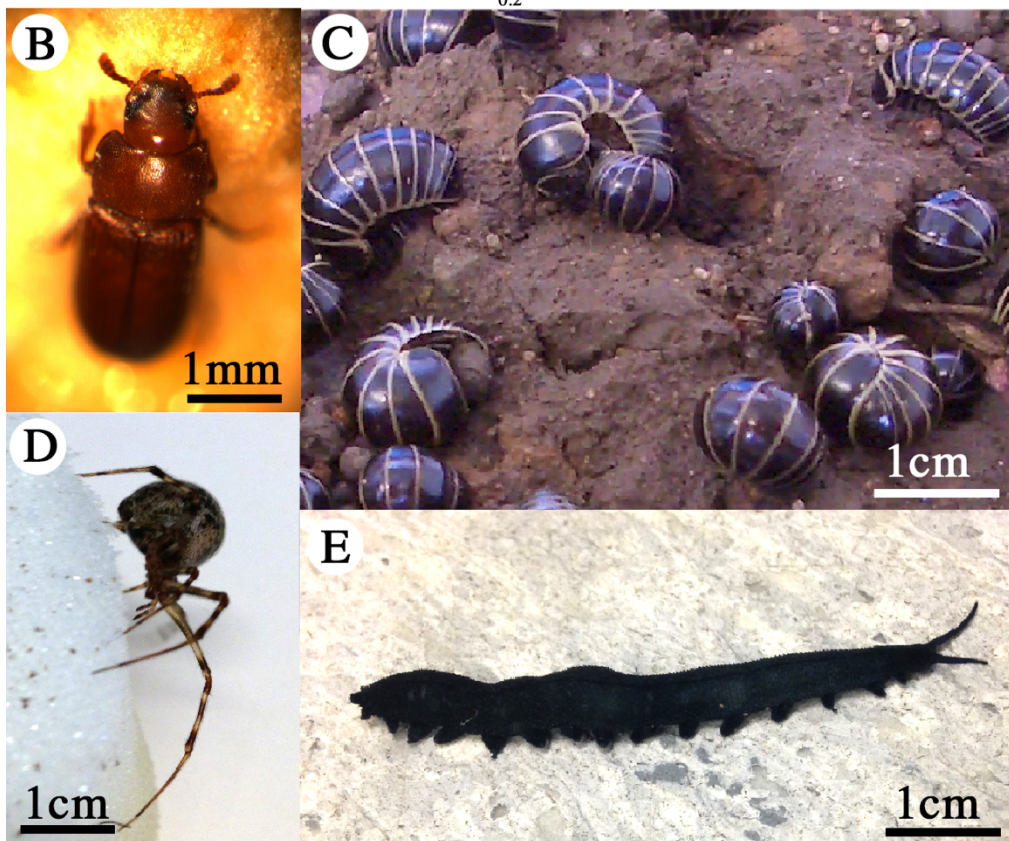

507

508 Fig. 1 Teneurin Phylogeny and research organisms

509

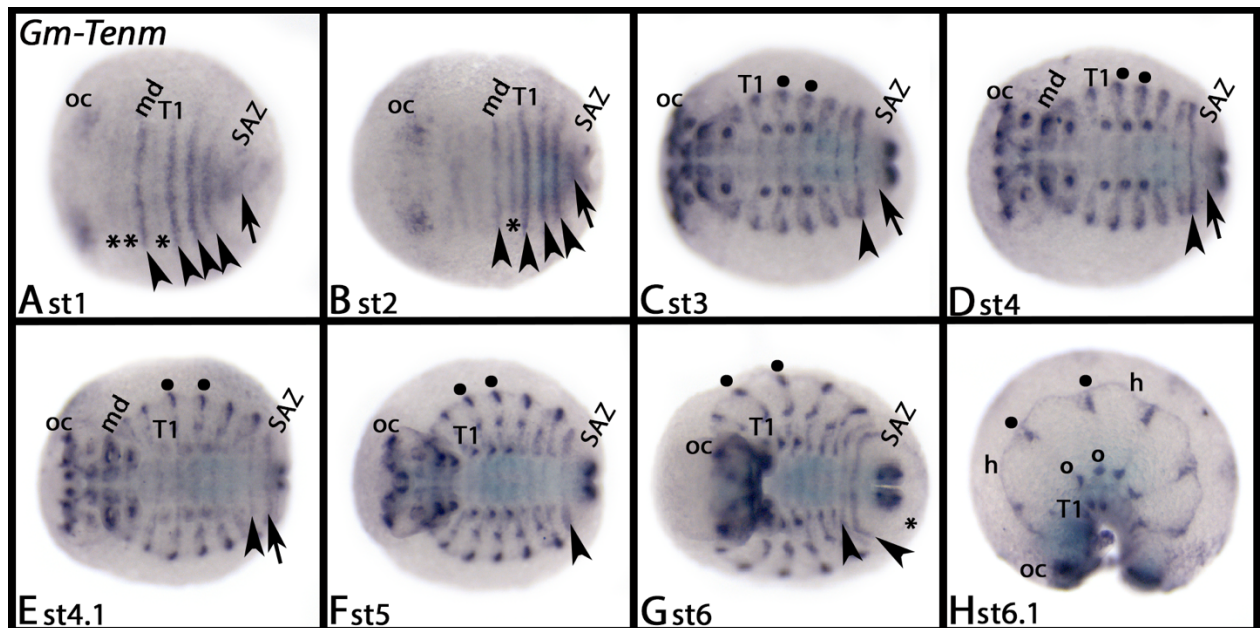

510

511 Fig. 2 Expression of *Glomeris Ten-m*

512

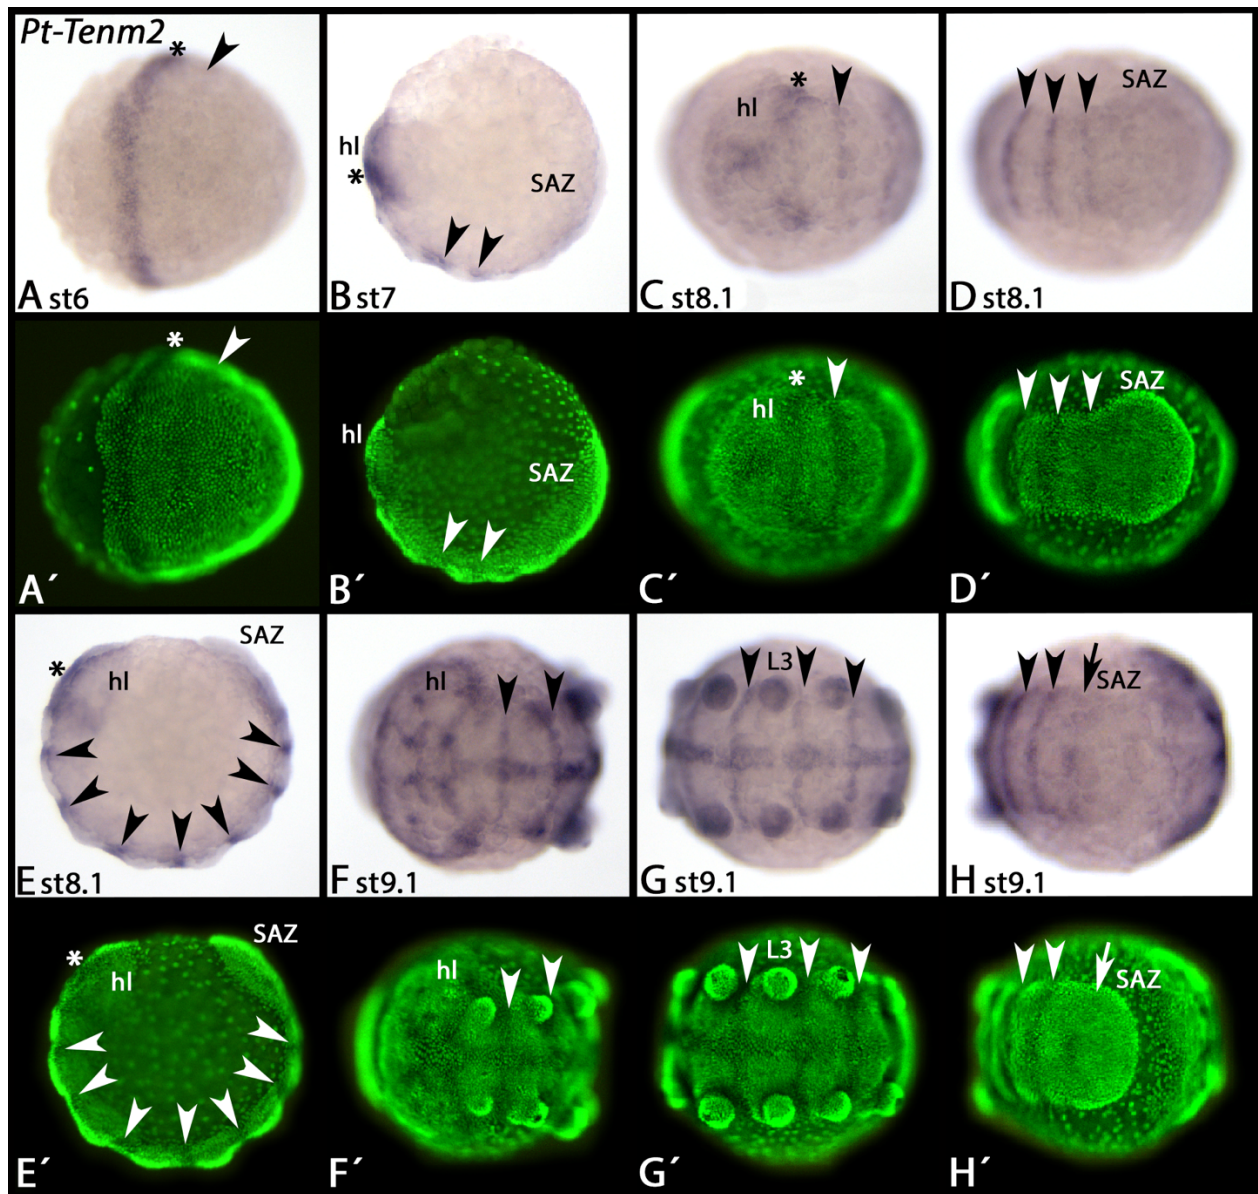

513

514 Fig. 3 Expression of *Parasteatoda Ten-m2*, early stages

515

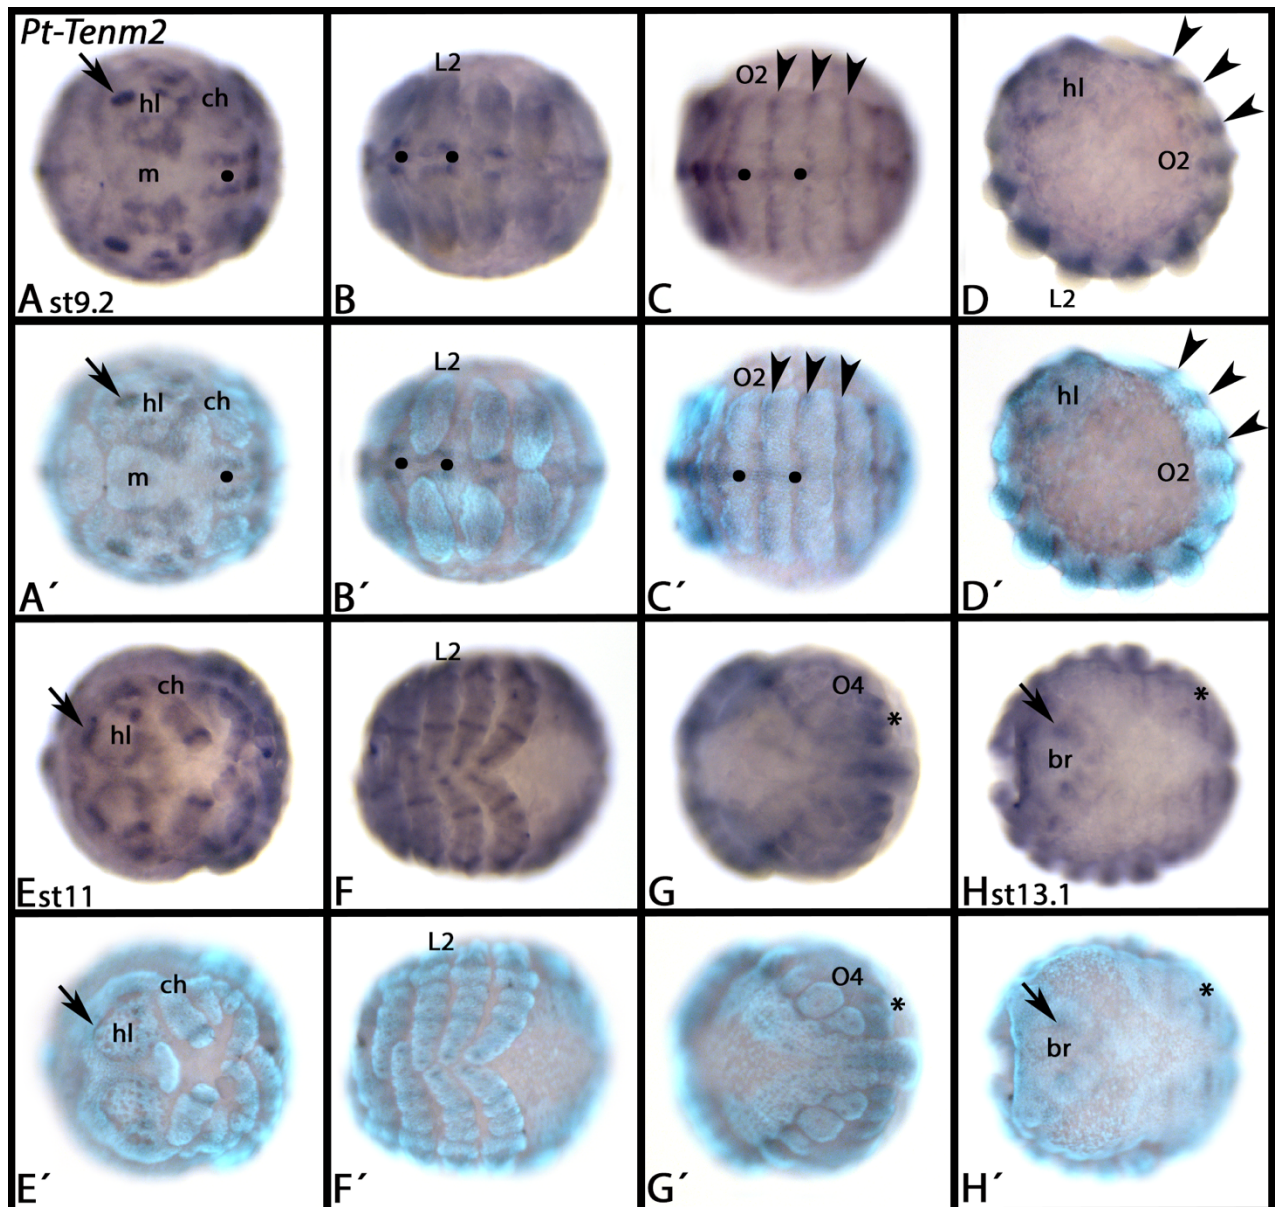

516

517 Fig. 4 Expression of *Parasteatoda Ten-m2*; late stages

518



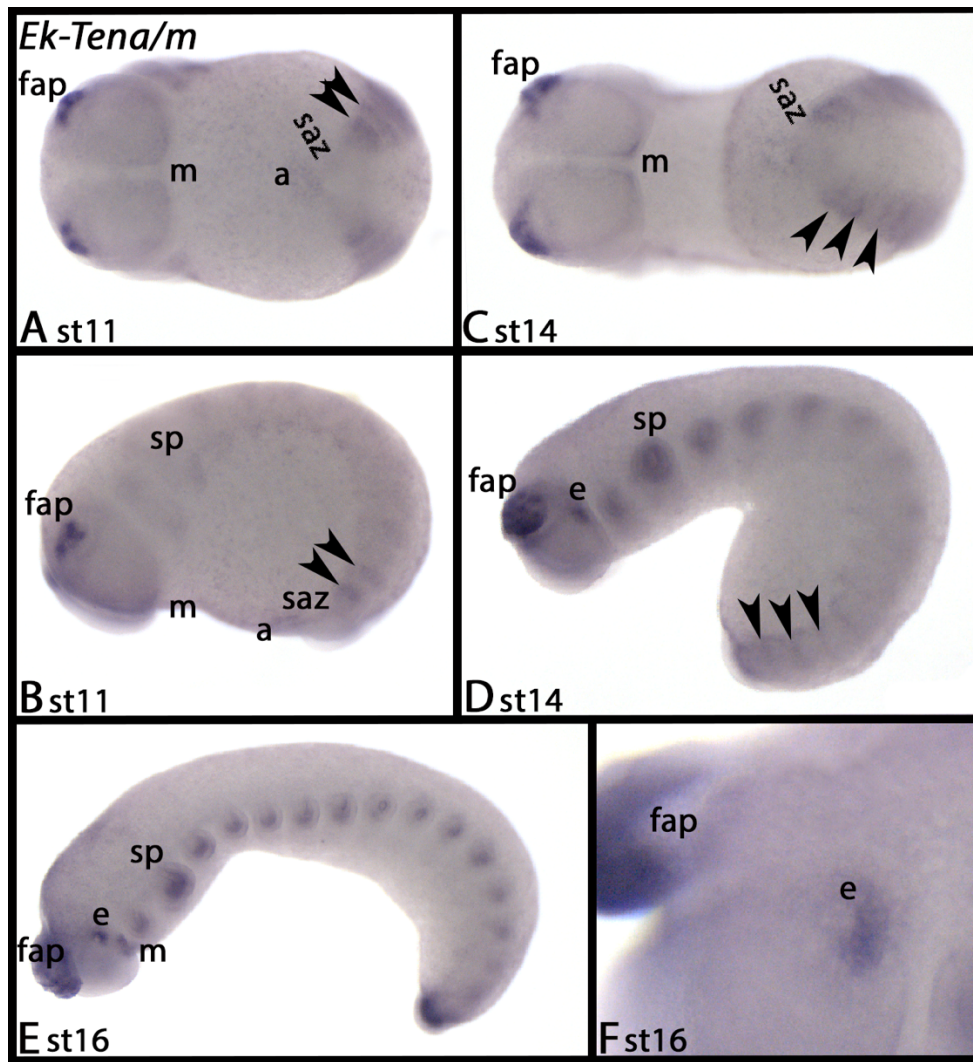

519

520 Fig. 5 Expression of *Euperipatoides Ten-a/m*
